# Supplementary material for: Plasmonic response of electrified metal–liquid interfaces during faradaic and non-faradaic reactions by enhanced optical transmission
Source: Royal Society of Chemistry journal article supplement (doi:10.1039/c2an35488h), 2012-01-01
Supplement: c2an35488h.pdf [file c2an35488h.pdf]

## Plasmonic Response at Electrified Metal-Liquid Interfaces during Faradaic and non-Faradaic Reactions by Enhanced Optical Transmission

Sean P. Branagan<sup>1</sup> and Paul W. Bohn<sup>1,2\*</sup>

<sup>1</sup>Department of Chemical and Biomolecular Engineering, University of Notre Dame, Notre Dame, IN 46556

<sup>2</sup>Department of Chemistry and Biochemistry, University of Notre Dame, Notre Dame, IN 46556

### Electronic Supplemental Information

#### I. Wavevector position vs. time

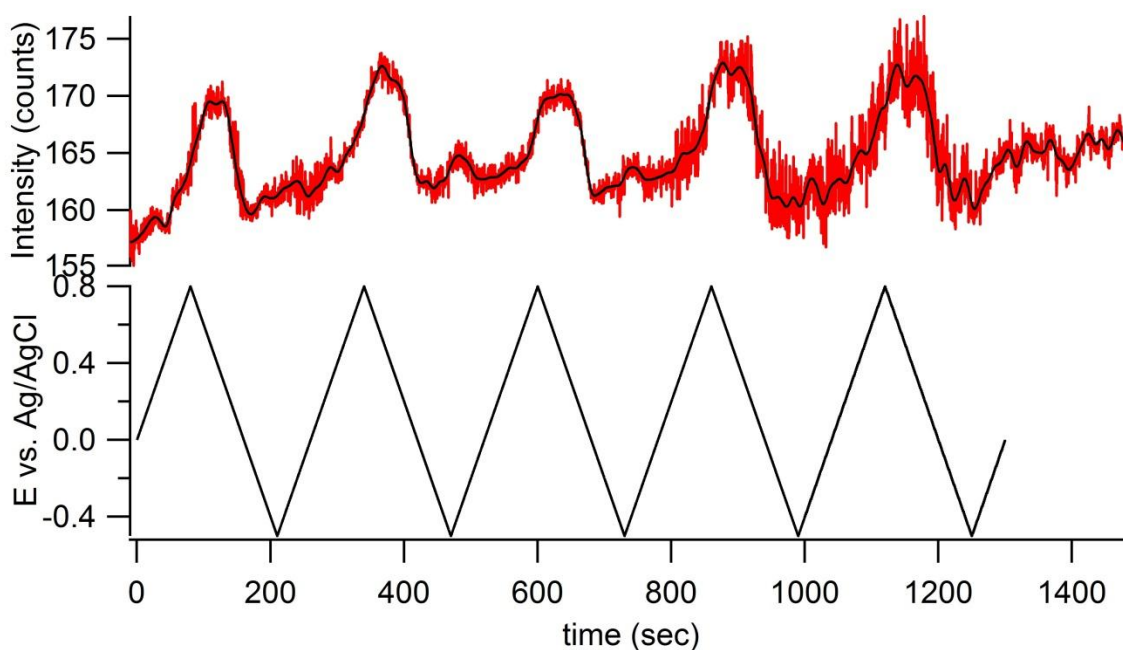

**Figure S1.** (Top) vertical cross section through Fig. 2(B) (main text), at the wavevector position  $k_x = 2.6 \times 10^{-3} \text{ nm}^{-1}$ . (Bottom) Potentials corresponding to the observed  $k_x$  values.

## II. Cyclic voltammetry

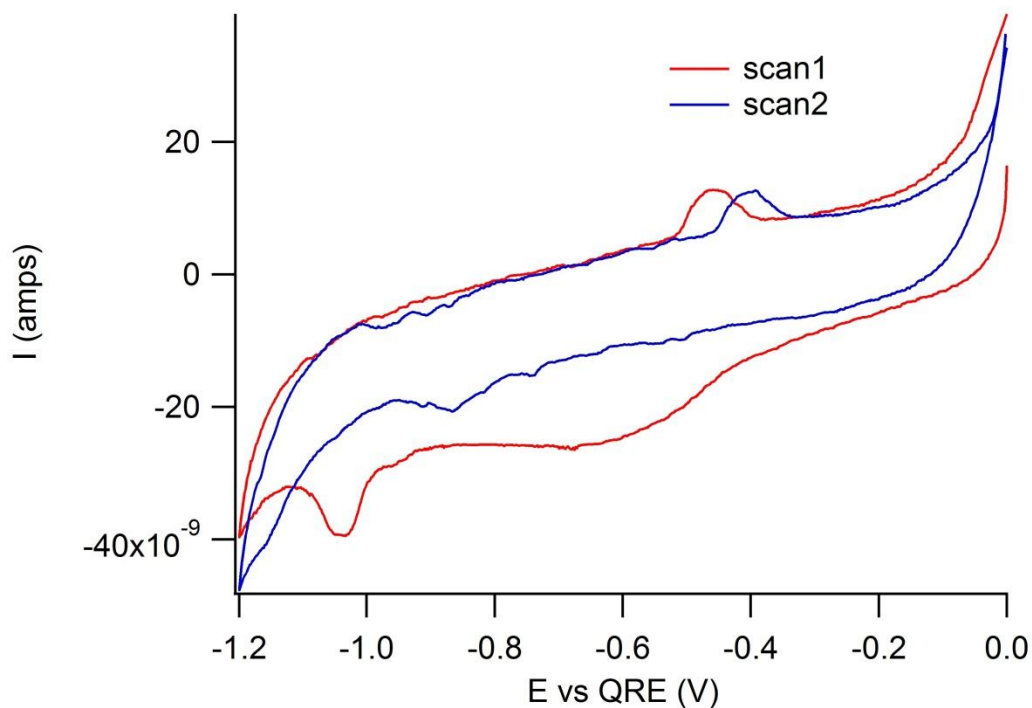

**Figure S2.** Cyclic voltammetry of DDT adsorption/desorption under conditions given for Rxn. 2 (Table 1, main text).

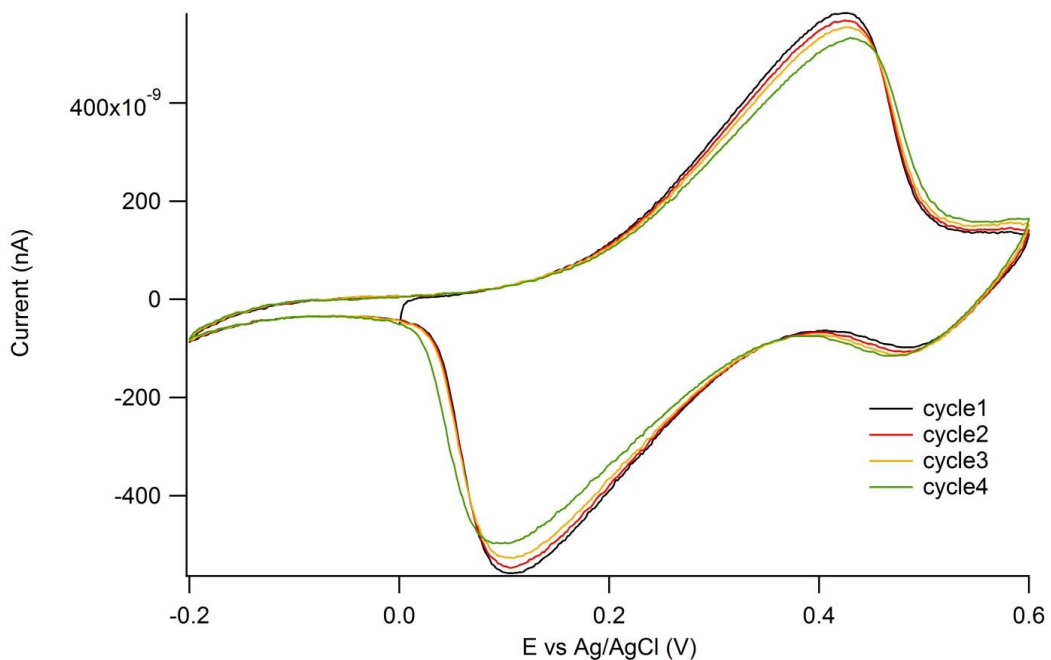

**Figure S3.** Cyclic voltammetry of ferri-ferrocyanide experiment under conditions given for Rxn. 3 (Table 1, main text).

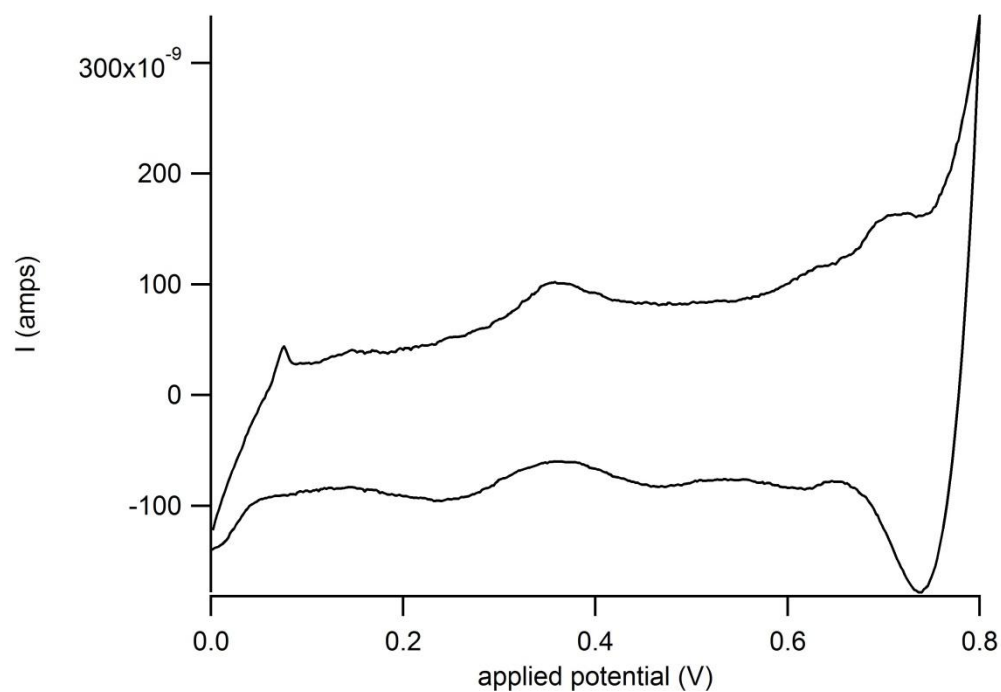

**Figure S4.** Cyclic voltammetry of sulfate/bisulfate adsorption under conditions given for Rxn. 4 (Table 1, main text).
